# Supplementary material for: An Assessment of Physical Activity and Risk Factors in People Living with Dementia: Findings from a Cross-Sectional Study in a Long-Term Care Facility in Vietnam
Source: MDPI journal article supplement (doi:10.3390/geriatrics9030057), 2024-04-29
Supplement: s1 [file s1]

**Table S2. Mean score of each component of Care Dependency Scale (CDS) (n=63).**

| <b>Score</b>                  | <b>Mean</b> | <b>SD</b> |
|-------------------------------|-------------|-----------|
| Eating and drinking           | 4.22        | 1.29      |
| Continence                    | 4.38        | 1.1       |
| Body posture                  | 4.1         | 1.2       |
| Mobility                      | 3.9         | 1.4       |
| Day/night pattern             | 4.24        | 1.32      |
| Getting dressed and undressed | 4.03        | 1.38      |
| Body temperature              | 4.33        | 1.22      |
| Hygiene                       | 3.94        | 1.47      |
| Avoidance of danger           | 4.24        | 1.25      |
| Communications                | 4.16        | 1.15      |
| Contact with others           | 4.1         | 1.23      |
| Sense of rules and values     | 4.17        | 1.19      |
| Daily activities              | 4.19        | 1.32      |
| Recreational activities       | 3.7         | 1.53      |
| Learning activities           | 3.6         | 1.47      |
