# Supplementary material for: An Assessment of Physical Activity and Risk Factors in People Living with Dementia: Findings from a Cross-Sectional Study in a Long-Term Care Facility in Vietnam
Source: MDPI journal article supplement (doi:10.3390/geriatrics9030057), 2024-04-29
Supplement: s1 [file s1]

**Table S1. Median and interquartile range (IQR) of BMI and some physical-related variables of study subjects (n=63).**

| Variables                                  | Median | Q1   | Q3   | IQR  |
|--------------------------------------------|--------|------|------|------|
| BMI                                        | 23.7   | 21.9 | 25.7 | 3.9  |
| Minutes per week of walking                | 420    | 210  | 1260 | 1050 |
| Walking (MET-minutes/week)                 | 1039.5 | 0    | 2772 | 2772 |
| Moderate (MET-minutes/week)                | 0      | 0    | 0    | 0    |
| Vigorous (MET-minutes/week)                | 0      | 0    | 0    | 0    |
| Total physical activity (MET-minutes/week) | 1386   | 66   | 3066 | 3000 |
